# Supplementary material
Source: publisher figshare collection journal article supplement (https://tandf.figshare.com/ndownloader/files/17992073)
Supplement: Supplementary file 1 [file 17992073]

| **Demographic** | | | **Clinical** | | | | | **Endoscopy** | | **Pathology** | **DIF** | |  | **Therapies since first diagnosis** | | |  | |
| --- | --- | --- | --- | --- | --- | --- | --- | --- | --- | --- | --- | --- | --- | --- | --- | --- | --- | --- |
| **Pt.** | **Age** | **Sex** | **LP skin** | **LP pilaris** | **LP oral** | **LP genital** | **Dys-phagia** | **Endoscopic findings** | **Sten-osis** | **Histo-pathology** | **Fibri- nogen** | **Other** | **Previous therapies** | **Systemic steroids** | **Topical steroids** | **Other systemic** | **Actual therapies**  **Response to BUD** | |
| **1** | **67** | **F** | **-** | **-** | **+** | **+** | **-** | **D3** | **-** | **P3** | **F2** | **IgG, IgM,** | **ACITR** | **+** | **+** | **ACITR** | **BUD MMF** | **+** |
| **2** | **59** | **F** | **+** | **+** | **+** | **+** | **(+)** | **D3** | **-** | **P3** | **F1** | **-** | **ACITR** | **-** | **+** | **ACITR** | **BUD ACITR** | **+** |
| **3** | **54** | **F** | **-** | **-** | **+** | **-** | **++** | **D3** | S1 | **P3** | **F2** | **-** | **-** | **+** | **+** | **AZA** | **BUD** | **+** |
| **4** | **60** | **F** | **-** | **+** | **+** | **+** | **++** | **D3** | **-** | **P3** | **F2** | **-** | **ACITR** | **-** | **+** | **ACITR, ALITR ADA, TACR** | **BUD**  **MMF** | **(+)** |
| **5** | **42** | **F** | **-** | **-** | **+** | **-** | **++** | **D3** | **-** | **P3** | **NA** | **NA** | **-** | **+** | **+** | **-** | **BUD** | **++** |
| **6** | **75** | **F** | **-** | **-** | **+** | **+** | **+** | **D2** | S1 | **P3** | **NA** | **NA** | **ACITR, FLUT MMF, CYA DIL** | **+** | **+** | **ACITR MMF, CYA** | **FLUT**  **PRED** | **-** |
| **7** | **78** | **M** | **-** | **-** | **+** | **-** | **+** | **D2** | **-** | **P2** | **F2** | **IgA, C3** | **ACITR** | **-** | **-** | **ACITR** | **ACITR** |  |
| **8** | **64** | **M** | **-** | **-** | **+** | **-** | **+** | **D2** | S1 | **P2** | **NA** | **(+)** | **PRED, FLUT DIL** | **+** | **+** | **-** | **FLUT**  **PRED** | **-** |
| **9** | **60** | **M** | **+** | **-** | **+** | **-** | **+** | **D2** | **-** | **P2** | **F0** | **-** | **ACITR** | **-** | **-** | **ACITR** | **ACITR** |  |
| **10** | **70** | **F** | **+** | **+** | **+** | **+** | **+** | **D2** | **-** | **P1** | **F2** | **-** | **ACITR, DAPS MMF, PRED** | **+** | **(+)** | **ACITR, DAPS AZA, MMF** | **ACITR**  **PRED** |  |
| **11** | **86** | **F** | **-** | **-** | **+** | **+** | **-** | **D3** | S2 | **P2** | **NA** | **NA** | **PRED, MTX** | **+** | **+** | **MTX** | **BUD**  **PRED** | **++** |
| **12** | **69** | **F** | **-** | **-** | **+** | **-** | **+** | **D2** | **-** | **P2** | **NA** | **NA** | **-** | **-** | **+** | **-** | **BUD** | **+** |
| **13** | **72** | **M** | **-** | **-** | **+** | **-** | **+** | **D3** | **-** | **P2** | **NA** | **NA** | **-** | **-** | **-** | **-** | **-** |  |
| **14** | **66** | **F** | **-** | **-** | **+** | **-** | **+** | **D3** | S2 | **P2** | **NA** | **NA** | **DIL** | **-** | **+** | **-** | **BUD** | **+** |
| **15** | **49** | **M** | **+** | **+** | **+** | **+** | **+** | **D3** | S2 | **P2** | **NA** | **+** | **BUD, PRED IgG INF DIL** | **-** | **+** | **-** | **BUD, PRED IgG INF** | **(+)** |
| **16** | **44** | **F** | **-** | **-** | **+** | **-** | **+** | **D3** | **-** | **P3** | **NA** | **NA** | **-** | **-** | **+** | **-** | **BUD** | **NA** |

**Table 2:** Findings in patients with severe esophageal lichen planus.

| **Demographic** | | | **Clinical** | | | | | **Endoscopy** | | **Pathology** | **DIF** | |  | **Therapies since first diagnosis** | | |  |
| --- | --- | --- | --- | --- | --- | --- | --- | --- | --- | --- | --- | --- | --- | --- | --- | --- | --- |
| **Pt.** | **Age** | **Sex** | **LP skin** | **LP pilaris** | **LP oral** | **LP genital** | **Dys-phagia** | **Endoscopic findings** | **Stenosis** | **Histo-pathology** | **Fibri- nogen** | **Other** | **Previous therapies** | **Systemic steroids** | **Topical steroids** | **Other systemic** | **Actual therapies** |
| **17** | **61** | **F** | **-** | **+** | **+** | **-** | **-** | **D1** | **-** | **P2** | **F1** | **-** | **-** | **-** | **-** | **ACITR** | **ACITR** |
| **18** | **51** | **M** | **-** | **-** | **-** | **-** | **+** | **D1** | **S1** | **P1** | **NA** | **NA** | **-** | **-** | **-** | **-** | **-** |
| **19** | **51** | **F** | **-** | **+** | **+** | **-** | **+** | **U** | **-** | **P3** | **F2** | **-** | **-** | **-** | **-** | **-** | **-** |
| **20** | **35** | **M** | **-** | **-** | **+** | **+** | **-** | **N** | **-** | **P2** | **F1** | **-** | **-** | **-** | **-** | **(-)** | **-** |
| **21** | **64** | **F** | **-** | **-** | **+** | **+** | **-** | **U** | **-** | **P2** | **F1** | **-** | **AZA** |  | **-** | **AZA** | **AZA** |
| **22** | **43** | **F** | **+** | **-** | **-** | **-** | **-** | **N** | **-** | **P1** | **F1** | **-** | **ACITR** | **-** | **-** | **ACITR** | **ACITR** |
| **23** | **68** | **F** | **+** | **-** | **-** | **-** | **-** | **D1** | **-** | **P1** | **F0** | **-** | **ACITR** | **-** | **-** | **ACITR** | **ACITR** |
| **24** | **54** | **F** | **+** | **-** | **+** | **-** | **-** | **N** | **-** | **P1** | **F2** | **-** |  |  |  |  |  |
| **25** | **63** | **M** | **-** | **-** | **+** | **-** | **+** | **D1** | **-** | **P2** | **F0** | **IgG** | **ACITR** | **-** | **+** | **ACITR** | **ACITR**  **BUD** |
| **26** | **77** | **F** | **+** | **-** | **+** | **-** | **+** | **U** | **-** | **P1** | **F1** | **-** | **ACITR, AZA, CYA** | **+** | **+** | **ACITR, AZA, CYA** | **NA** |
| **27** | **44** | **M** | **+** | **-** | **+** | **-** | **(+)** | **D1** | **-** | **P2** | **F0** | **-** | **-** | **-** | **-** | **-** | **-** |
| **28** | **59** | **M** | **+** | **-** | **+** | **+** | **(+)** | **D1** | **-** | **P1** | **F0** | **-** | **ACITR** | **-** | **-** | **ACITR** | **ACITR** |
| **29** | **59** | **F** | **-** | **-** | **+** | **+** | **+** | **D1** | **-** | **P1** | **F1** | **-** | **ACITR** | **-** | **-** | **ACITR** | **ACITR** |
| **30** | **36** | **F** | **+** | **+** | **-** | **+** | **-** | **D1** | **-** | **P1** | **NA** | **-** | **-** | **-** | **-** | **-** | **-** |
| **31** | **61** | **F** | **-** | **-** | **+** | **+** | **-** | **D1** | **-** | **P1** | **F1** | **IgG, IgM, C3** | **-** | **-** | **+** | **(+)** | **NA** |
| **32** | **52** | **F** | **-** | **-** | **+** | **-** | **-** | **D1** | **-** | **P1** | **F0** | **-** | **-** | **-** | **-** | **-** | **-** |
| **33** | **62** | **F** | **-** | **-** | **+** | **-** | **-** | **D1** | **-** | **P1** | **F0** | **-** | **-** | **-** | **-** | **-** | **-** |
| **34** | **49** | **F** | **+** | **-** | **-** | **-** | **+** | **D1** | **-** | **P1** | **F1** | **(+)** | **-** | **-** | **-** | **-** | **ABA**  **LEF** |

**Table 3:** Findings in patients with mild esophageal lichen planus.

| **Demographic** | | | **Clinical** | | | | | **Endoscopy** | | **Pathology** | **DIF** | |  | **Therapies since first diagnosis** | | |  |
| --- | --- | --- | --- | --- | --- | --- | --- | --- | --- | --- | --- | --- | --- | --- | --- | --- | --- |
| **Pt.** | **Age** | **Sex** | **LP skin** | **LP pilaris** | **LP oral** | **LP genital** | **Dys-phagia** | **Endoscopic findings** | **Stenosis** | **Histo-pathology** | **Fibri- nogen** | **Other** | **Previous therapies** | **Systemic steroids** | **Topical steroids** | **Other systemic** | **Actual therapies** |
| **35** | **50** | **F** | **-** | **+** | **+** | **-** | **-** | **N** | **-** | **P1** | **F0** | **-** | **-** |  |  |  |  |
| **36** | **59** | **F** | **-** | **+** | **+** | **-** | **-** | **N** | **-** | **P0** | **F1** | **-** | **-** |  |  |  |  |
| **37** | **77** | **F** | **-** | **+** | **-** | **-** | **-** | **N** | **-** | **P0** | **F0** | **-** | **-** |  |  |  |  |
| **38** | **61** | **F** | **-** | **+** | **-** | **-** | **-** | **N** | **-** | **P1** | **F0** | **-** | **-** |  |  |  |  |
| **39** | **51** | **F** | **+** | **-** | **+** | **-** | **+** | **N** | **-** | **P2** | **F0** | **-** | **-** |  |  |  |  |
| **40** | **57** | **M** | **-** | **-** | **+** | **-** | **-** | **N** | **-** | **P2** | **F0** | **-** | **-** |  |  |  |  |
| **41** | **58** | **M** | **-** | **-** | **+** | **-** | **-** | **N** | **-** | **P1** | **F0** | **-** | **-** |  |  |  |  |
| **42** | **66** | **F** | **-** | **-** | **+** | **+** | **-** | **N** | **-** | **P1** | **F0** | **-** | **-** |  |  |  |  |
| **43** | **66** | **F** | **-** | **+** | **+** | **-** | **-** | **N** | **-** | **P1** | **F0** | **-** | **-** |  |  |  |  |
| **44** | **65** | **F** | **+** | **-** | **+** | **+** | **-** | **N** | **-** | **P1** | **F0** | **-** | **-** | **+** | **-** | **-** | **NA** |
| **45** | **30** | **M** | **+** | **-** | **-** | **-** | **-** | **N** | **-** | **P1** | **F0** | **-** | **-** |  |  |  |  |
| **46** | **56** | **F** | **-** | **-** | **+** | **-** | **-** | **N** | **-** | **P1** | **F0** | **-** | **-** |  |  |  |  |
| **47** | **58** | **F** | **+** | **-** | **-** | **-** | **-** | **N** | **-** | **P1** | **F0** | **-** | **-** |  |  |  |  |
| **48** | **64** | **F** | **-** | **-** | **+** | **-** | **-** | **N** | **-** | **P0** | **F0** | **-** | **MTX, TACR** |  |  |  |  |
| **49** | **80** | **F** | **-** | **-** | **+** | **-** | **-** | **N** | **-** | **P0** | **NA** | **NA** | **ACIT** |  |  |  |  |
| **50** | **61** | **F** | **+** | **-** | **+** | **-** | **-** | **N** | **-** | **P0** | **F0** | **-** | **ACITR CYA** |  |  |  |  |
| **51** | **57** | **F** | **-** | **-** | **+** | **-** | **-** | **N** | **-** | **P0** | **F0** | **-** | **-** |  |  |  |  |
| **52** | **53** | **F** | **-** | **-** | **+** | **-** | **-** | **N** | **-** | **P0** | **F0** | **IgG, IgM** | **ACITR** |  |  |  |  |

**Table 4:** Findings in patients with no esophageal lichen planus
